# Supplementary material for: Risk Factors and Risk Stratification of Thromboembolic Risk in Patients with Multiple Myeloma
Source: MDPI journal article supplement (doi:10.3390/hemato3030036), 2022-08-29
Supplement: s1 [file s1]

Archive with 1 entries (1 files):
- hemato-1810555-supplementary.pdf
