# Supplementary material for: Risk Factors and Risk Stratification of Thromboembolic Risk in Patients with Multiple Myeloma
Source: MDPI journal article supplement (doi:10.3390/hemato3030036), 2022-08-29
Supplement: s1 [file s1 › hemato-1810555-supplementary.pdf]

**Table S1.** Overview of the studies on risk for thromboembolism (review articles excluded).

| Study                      | Cohort (n) | Incidence/Risk for VTE                                                                                      | Incidence/Risk for ATE                                                                     |
|----------------------------|------------|-------------------------------------------------------------------------------------------------------------|--------------------------------------------------------------------------------------------|
| Kristinsson SY et al. 2010 | 18 627     | HR: 7.5 (6.4-8.9), 4.6 (4.1-5.1), and 4.1 (3.8-4.5), for 1, 5 and 10 years after diagnosis                  | HR: 1.9 (1.8-2.1), 1.5 (1.4-1.6), and 1.5 (1.4-1.5), for 1, 5 and 10 years after diagnosis |
| Fotiou D et al. 2018       | 144        | 12% cumulative rate (12 months)                                                                             |                                                                                            |
| Leleu X et al. 2013        | 524        | 7% (12 months)                                                                                              |                                                                                            |
| Rus C et al. 2004          | 131        | 7,6% (2 years)                                                                                              | 0.8% (2 years)                                                                             |
| Barlogie B et al. 2001     | 169        | <2%                                                                                                         |                                                                                            |
| Zangari M et al. 2003      | 535        | 15%                                                                                                         |                                                                                            |
| Zangari M et al. 2002      | 232        | 13.4%                                                                                                       |                                                                                            |
| Dimopoulos M et al. 2007   | 351        | 11.4% (treatment with lenalidomide plus dexamethasone) vs. 4.6% (treatment with placebo plus dexamethasone) |                                                                                            |

**Table S2.** Overview of the differences in hemostatic markers and global hemostatic methods between patients with MM and controls (as referred to in the manuscript).

|                               | Increased | Decreased | Similar |
|-------------------------------|-----------|-----------|---------|
| Von Willebrand factor         | x         |           |         |
| D-dimer                       | x         |           |         |
| Factor VIII                   | x         | x*        |         |
| Protein C                     | x         |           |         |
| Protein S                     |           |           | x       |
| Antithrombin                  |           |           | x       |
| Activated tissue factor       | x         |           |         |
| Activated factor VII          | x         |           |         |
| Factor X                      |           | x**       |         |
| Phospholipids                 | x         |           |         |
| <b>Thrombin generation</b>    |           |           |         |
| Peak thrombin                 | x         | x         | x       |
| Time to peak (thrombin)       | x         | x         |         |
| Velocity index                | x         |           |         |
| Endogenous Thrombin Potential | x         | x         |         |
| <b>Thromboelastogram</b>      |           |           |         |
| Maximum amplitude             | x         |           |         |

\*in cases of acquired hemophilia A; \*\*in cases of concurrent light chain amyloidosis.
